# Supplementary material
Source: HighWire-hosted journal article supplement (https://bibliotheek.ehb.be/content/suppl/2022/09/27/8.3.e001374)
Supplement: bmjsem-2022-001374supp003_data_supplement.pdf [file bmjsem-2022-001374supp003_data_supplement.pdf]

**Supplemental Table 3.** Quality assessment of systematic review studies [26].

| <b>Author</b>        | <b>A thorough literature search was performed</b> | <b>Characteristics of the included studies provided</b> | <b>Scientific quality of the included studies assessed and documented</b> | <b>Appropriate methods to combine the findings of the studies</b> | <b>Assessed the likelihood of publication bias</b> |
|----------------------|---------------------------------------------------|---------------------------------------------------------|---------------------------------------------------------------------------|-------------------------------------------------------------------|----------------------------------------------------|
| O'Brien & Finch [40] | Yes                                               | Yes                                                     | Yes                                                                       | Yes                                                               | Not described                                      |
